# Supplementary material for: Association between blood cell inflammatory indices and sarcopenic obesity in middle-aged and older Chinese adults: a cross-sectional study
Source: Research Square preprint supplement (doi:10.21203/rs.3.rs-8441209/v1), 2026-01-28
Supplement: Supplementary file 1 [file 0bd84af7365734f56a5195ec.docx]

Additional file 1. The main baseline characteristics of patients classified using BMI

|  | nonsarcopenic nonobesity n = 411, 40.7% | nonsarcopenic obesity  n= 33, 3.3% | Sarcopenic nonobesity n = 383, 37.9% | sarcopenic obesity n = 182, 18.0% | P value |
| --- | --- | --- | --- | --- | --- |
| **Demographics** |  |  |  |  |  |
| Age (years) | 58.68±6.99 b, c, d | 55.63±4.58 a, c, d | 62.86±8.45 a, b | 60.86±7.41 a, b | <0.001 |
| Gender / % male | 216(52.5%) | 28(84.8%) | 168(43.8%) | 102(56.0%) | <0.001 |
| Hypertension (%) | 108(26.2%) | 9(27.3%) | 153(39.9%) | 98(53.8%) | <0.001 |
| Diabetes (%) | 40(9.7%) | 7(21.2%) | 57(14.9%) | 30(16.5%) | 0.033 |
| Osteoporosis(%) | 289(70.3%) | 21(63.6%) | 265(69.1%) | 128(70.3%) | 0.866 |
| Nonalcoholic fatty liver (%) | 103(25.0%) | 22(66.6%) | 163(42.5%) | 139(76.3%) | <0.001 |
| **Metabolic panel** |  |  |  |  |  |
| Triglycerides (mmol/l) | 1.69±2.16 | 1.96±1.49 | 1.84±1.90 | 2.09±1.75 | 0.145 |
| Total cholesterol (mmol/l) | 5.20±1.17 d | 5.14±1.09 | 5.27±1.12 d | 1.03±0.07 a, c | 0.035 |
| HDL cholesterol (mmol/l) | 1.44±0.37 b, c, d | 1.13±0.22 a, c | 1.37±0.40 a, b, d | 1.23±0.27 a, c | <0.001 |
| LDL cholesterol (mmol/l) | 3.16±1.00 | 3.27±0.96 | 3.24±0.98 d | 3.02±0.90 c | 0.077 |
| Creatinine (μmol /L) | 64.15±14.57 b, c | 72.03±14.22 a, c, d | 61.30±15.41 a, b, d | 64.44±17.20 b, c | <0.001 |
| Uric acid (μmol/L) | 341.09±84.36 a, b, d | 379.66±68.95 c | 344.99±93.35 b, d | 381.57±91.92 a, c | <0.001 |
| Fasting blood glucose (mmol/L) | 5.68±1.54 c | 6.12±1.63 | 6.06±2.16 a | 5.91±1.20 | 0.016 |
| **Anthropometric Measurements** |  |  |  |  |  |
| Height (cm) | 164.85±8.07 b, c, d | 169.75±6.08 a, c, d | 160.11±8.31 a, b, d | 162.53±8.98 a, b, c | <0.001 |
| Weight (kg) | 64.63±10.27 b, d | 85.40±7.77 a, c, d | 65.12±8.64 b, d | 80.65±11.52 a, b, c | <0.001 |
| WC (cm) | 82.81±8.67 b, c, d | 98.12±6.26 a, c | 86.03±7.39 a, b, d | 98.54±8.53 a, c | <0.001 |
| BMI (kg/m²) | 23.65±2.40 b, c, d | 29.58±1.36 a, c, d | 25.31±1.80 a, b, d | 30.40±2.35 a, b, c | <0.001 |
| SBP (mmHg) | 128.16±16.68 c, d | 134.36±13.85 | 134.16±17.77 a, d | 140.70±20.67 a, c | <0.001 |
| DBP (mmHg) | 77.29±10.61 b, c, d | 84.93±9.8 a, c | 79.27±10.80 a, b, d | 82.89±11.85 a, c | <0.001 |
| PBF (%) | 28.11±5.43 c, d | 29.30±3.80 c, d | 36.26±4.84 a b, d | 39.52±5.30 a, b, c | <0.001 |
| WHR | 0.89±0.06 b, c, d | 0.96±0.03 a, c, d | 0.93±0.05 a, b, d | 0.99±0.06 a, b, c | <0.001 |
| VFA (cm2) | 84.47±21.44 b, c, d | 113.40±15.81 a, c, d | 123.20±23.92 a, b, d | 163.23±29.98 a, b, c | <0.001 |
| FFMI (kg/m²) | 17.49±10.99 b, c | 20.91±1.56 a, c | 16.06±1.63 a, b, d | 18.35±1.78 c | <0.001 |
| FMI (kg/m²) | 6.69±1.51 b, c, d | 8.66±1.15 a, d | 9.19±1.48 a, d | 12.06±2.14 a, b, c | <0.001 |
| SMI (kg/m²) | 7.08±1.18 b, c, d | 8.75±0.71 a, c, d | 6.59±0.85 a, b, d | 7.68±0.93 a, b, c | <0.001 |
| SMI/WT | 39.29±3.71 c, d | 39.67±2.53 c, d | 34.24±2.97 a b, d | 33.08±3.44 a, b, c | <0.001 |

BMI: Body Mass Index; PBF: Percent Body Fat; WHR: Waist-Hip Ratio; VFA: Visceral Fat Area; FFMI: Fat-Free Mass Index; FMI: Fat Mass Index; SMI: Skeletal Muscle Index; SBP: Systolic Blood Pressure; DBP: Diastolic Blood Pressure; HDL-C: low-density lipoprotein-cholesterol; LDL-C: high-density lipoproteincholesterol.

a Significant difference compared to nonsarcopenic nonobesity.

b Significant difference compared to nonsarcopenic obesity.

c Significant difference compared to sarcopenic nonobesity.

d Significant difference compared to sarcopenic obesity (LSD post hoc tests).
