# Supplementary material for: Association between blood cell inflammatory indices and sarcopenic obesity in middle-aged and older Chinese adults: a cross-sectional study
Source: Research Square preprint supplement (doi:10.21203/rs.3.rs-8441209/v1), 2026-01-28
Supplement: Supplementary file 2 [file 3d21a61bf44de1fd4bd5bd49.docx]

Additional file 4. The blood cell counts and blood cell inflammatory indices of patients classified using VFA [X±s, M(Q1, Q3)]

|  | nonsarcopenic nonobesity n = 331, 32.8% | nonsarcopenic obesity  n= 113, 11.2% | Sarcopenic nonobesity  n = 72, 7.1% | sarcopenic obesity n = 493, 48.9% | P value |
| --- | --- | --- | --- | --- | --- |
| WBC/( 10^9 /L) | 5.80±1.52 d | 5.87±1.46 d | 6.10±1.49 | 6.28±1.56 a, b | <0.001 |
| NEUT /( 10^9 /L) | 3.37±1.15 | 3.79±4.61 | 3.62±1.13 | 3.75±2.23 | 0.112 |
| LYM/( 10^9 /L) | 1.95±0.58 d | 2.01±0.52 | 1.92±0.55 d | 2.09±0.59 a, c | 0.003 |
| MONO/( 10^9 /L) | 0.39±1.58 | 0.30±0.09 | 0.35±0.12 | 0.33±0.10 | 0.738 |
| PLT /( 10^9 /L) | 217.03±52.71 b | 236.69±172.02 a, c | 207.15±46.64 b | 225.32±59.26 | 0.033 |
| PLR | 111.65(91.76, 138.06) | 119.28(90.28, 138.90) | 106.44(86.29, 139.53) | 108.72(88.30, 133.61) | 0.354 |
| NLR | 1.67(1.35, 2.21) | 1.62(1.31, 2.10) | 1.88(1.40, 2.32) | 1.70(1.31, 2.15) | 0.221 |
| LMR | 6.48(5.19, 7.92) c | 6.89(5.72, 8.27) c | 5.71(4.74, 7.15) | 6.55(5.00, 8.28) c | 0.009 |
| PWR | 37.52(31.53, 45.16) c | 39.42(30.42, 46.54) c | 32.64(28.52, 39.77) | 36.20(29.88, 43.69) | 0.003 |
| SII | 361.60(268.85, 474.70) | 345.45(290.36, 473.52) | 371.07(262.49, 505.19) | 374.81(286.94, 494.94) | 0.444 |
| SIRI | 0.49(0.34, 0.70) | 0.46(0.34, 0.65) | 0.60(0.42, 0.81) a, b | 0.54(0.37, 0.74) | 0.002 |
| AISI | 106.54(67.28, 153.88) | 100.06(72.19, 144.58) | 113.23(86.50, 182.42) | 116.47(78.13, 171.73) a | 0.012 |

WBC: white blood cells; NEUT: neutrophils; LYM: lymphocytes; MONO: monocytes; PLT: platelets; NLR: neutrophil-to-lymphocyte ratio; PLR: platelet-to-lymphocyte ratio; LMR: lymphocyte-to-monocyte ratio; PWR: platelet-to-white blood cell ratio; SII: systemic immune-inflammation index; SIRI: systemic inflammation response index; AISI: aggregate inflammation systemic index.

a Significant difference compared to nonsarcopenic nonobesity.

b Significant difference compared to nonsarcopenic obesity.

c Significant difference compared to sarcopenic nonobesity.

d Significant difference compared to sarcopenic obesity (LSD post hoc tests).
