# Supplementary material for: Association between blood cell inflammatory indices and sarcopenic obesity in middle-aged and older Chinese adults: a cross-sectional study
Source: Research Square preprint supplement (doi:10.21203/rs.3.rs-8441209/v1), 2026-01-28
Supplement: Supplementary file 3 [file 8689ed4fc5006d4ded22cf82.docx]

Additional file 8. Association between sarcopenic obesity defined by BMI and blood cell inflammatory indices

|  | unadjusted model  OR ( 95% CI) | p | Model 1  OR ( 95% CI) | P | Model 2  OR ( 95% CI) | P | Model 3  OR ( 95% CI) | P |
| --- | --- | --- | --- | --- | --- | --- | --- | --- |
| NLR | 1.711(1.146 - 2.554) | 0.009 | 1.645(1.096 – 2.468) | 0.016 | 1.611(1.062 – 2.444) | 0.025 | 1.459(0.948 – 2.247) | 0.086 |
| PLR | 0.838(0.583 – 1.205) | 0.339 | 0.884(0.607 – 1.288) | 0.522 | 0.967(0.658 – 1.422) | 0.864 | 1.031(0.693 – 1.532) | 0.881 |
| LMR | 0.595(0.395 – 0.897) | 0.013 | 0.634(0.416 – 0.967) | 0.034 | 0.598(0.390 – 0.917) | 0.019 | 0.659(0.426 – 1.020) | 0.061 |
| PWR | 0.561(0.356 – 0.884) | 0.013 | 0.610(0.388 – 0.961) | 0.033 | 0.680(0.435 – 1.062) | 0.090 | 0.791(0.520 – 1.203) | 0.274 |
| SII | 1.402(1.012 – 1.941) | 0.042 | 1.421(1.025 – 1.969) | 0.035 | 1.386(0.994 – 1.932) | 0.055 | 1.310(0.937 – 1.830) | 0.114 |
| AISI | 1.543(1.214 – 1.961) | 0.000 | 1.519(1.191 – 1.936) | 0.001 | 1.484(1.156 – 1.905) | 0.002 | 1.374(1.066 – 1.771) | 0.014 |
| SIRI | 1.798(1.362 – 2.374) | 0.000 | 1.757(1.317 – 2.345) | 0.000 | 1.562(1.103 – 2.211) | 0.000 | 1.539(1.133 – 2.092) | 0.006 |

NLR: Neutrophil-to-Lymphocyte Ratio; PLR: Platelet-to-Lymphocyte Ratio; LMR: Lymphocyte-to-Monocyte Ratio; PWR: Platelet-to-White Blood Cell Ratio; SII: Systemic Immune-Inflammation Index; SIRI: Systemic Inflammatory Response Index; AISI: Aggregate Inflammation Systemic Index.

Model 1 = age, gender; Model 2 = Model 1 + hypertension, diabetes; Model 3 = Model 2 + high-density lipoprotein cholesterol, low-density lipoprotein cholesterol, triglycerides, total cholesterol, creatinine.
