# Supplementary material for: Association between blood cell inflammatory indices and sarcopenic obesity in middle-aged and older Chinese adults: a cross-sectional study
Source: Research Square preprint supplement (doi:10.21203/rs.3.rs-8441209/v1), 2026-01-28
Supplement: Supplementary file 4 [file 8b53d4591221e6bea2f115ff.docx]

Additional file 2. The main baseline characteristics of patients classified using PBF

|  | nonsarcopenic nonobesity n = 439, 43.5% | nonsarcopenic obesity  n= 5, 0.4% | Sarcopenic nonobesity n = 181, 17.9% | sarcopenic obesity n = 384, 38.1% | P value |
| --- | --- | --- | --- | --- | --- |
| **Demographics** |  |  |  |  |  |
| Age (years) | 58.48±6.89 c, d | 56.40±6.65 | 7.81±0.58 a | 8.28±0.42 a | <0.001 |
| Gender / % male | 239(54.4%) | 5(100%) | 39(21.5%) | 231(60.1%) | <0.001 |
| Hypertension (%) | 116(26.4%) | 1(20.0%) | 61(33.7%) | 190(49.5%) | <0.001 |
| Diabetes (%) | 45(10.3%) | 2(40.0%) | 26(14.4%) | 61(15.9%) | 0.029 |
| Osteoporosis (%) | 306(69.7%) | 4(80.0%) | 122(67.4%) | 271(70.5%) | 0.840 |
| Nonalcoholic fatty liver (%) | 121(27.5%) | 4(80.0%) | 60(33.1%) | 242(63.0%) | <0.001 |
| **Metabolic panel** |  |  |  |  |  |
| Triglycerides (mmol/l) | 1.70±2.12 d | 2.37±1.70 | 1.66±0.86 d | 2.05±1.17 a, c | 0.043 |
| Total cholesterol (mmol/l) | 5.19±1.16 | 5.53±1.34 | 5.30±1.05 | 5.11±1.12 | 0.245 |
| HDL-C (mmol/l) | 1.42±0.37 a, b, d | 1.08±0.20 c | 1.45±0.36 b, d | 1.27±0.37 a, c | <0.001 |
| LDL-C (mmol/l) | 3.16±0.99 | 3.50±1.25 | 3.23±0.93 | 3.14±0.98 | 0.654 |
| Creatinine (μmol /L) | 64.62±14.65 c | 15.36±6.87 c | 12.88±0.95 a, b, d | 16.79±0.85 c | <0.001 |
| Uric acid (μmol/L) | 343.60±84.16 c, d | 375.60±44.44 | 321.23±78.44 a, d | 373.52±96.67 a, c | <0.001 |
| Fasting blood glucose (mmol/L) | 5.68±1.52 b, c, d | 7.78±3.03 a, c, d | 6.04±2.18 a, b | 6.00±1.76 a, b | 0.002 |
| **Anthropometric Measurements** |  |  |  |  |  |
| Height (cm) | 165.18±8.07 c, d | 168.40±4.39 c | 157.73±7.82 a, b, d | 162.38±8.56 a, c | <0.001 |
| Weight (kg) | 65.98±11.39 b, c, d | 82.68±5.22 a, c | 61.75±8.27 a, b, d | 74.07±11.58 a, c | <0.001 |
| WC (cm) | 83.78±9.30 b, d | 98.20±8.52 a, c | 82.84±7.32 b, d | 93.49±8.82 a, c | <0.001 |
| BMI (kg/m²) | 24.03±2.77 b, c, d | 29.16±0.75 a, c | 24.76±2.22 a, b, d | 27.99±2.92 a, c | <0.001 |
| SBP (mmHg) | 128.61±16.61 c, d | 129.60±11.21 | 132.28±16.93 a, d | 138.15±19.62 a, c | <0.001 |
| DBP (mmHg) | 77.81±10.76 d | 82.00±6.55 | 77.95±10.81 d | 11.30±0.57 a, c | <0.001 |
| PBF (%) | 28.24±5.23 c, d | 30.28±0.25 c, d | 35.96±3.84 a, b, d | 38.02±5.37 a, b, c | <0.001 |
| WHR | 0.89±0.06 b, c, d | 0.99±0.05 a, c | 0.91±0.04 a, b, d | 0.97±0.05 a, c | <0.001 |
| VFA (cm2) | 86.35±22.34 b, c, d | 110.60±12.05 a, d | 115.84±21.05 a, d | 145.64±31.91 a, b, c | <0.001 |
| FFMI (kg/m²) | 17.71±10.67 c | 20.32±0.57 | 15.75±1.73 a, d | 17.29±1.92 c | 0.014 |
| FMI (kg/m²) | 6.81±1.56 b, c, d | 8.80±0.18 a, d | 8.88±1.54 a, d | 10.69±2.20 a, b, c | <0.001 |
| SMI (kg/m²) | 7.19±1.23 b, c | 8.48±0.31 a, c, d | 6.37±0.80 a, d | 7.21±0.99 b, c | <0.001 |
| SMI/WT | 39.32±3.65 c, d | 39.38±0.08 c, d | 34.24±2.46 a, b | 33.69±3.45 a, b | <0.001 |

BMI: Body Mass Index; PBF: Percent Body Fat; WHR: Waist-Hip Ratio; VFA: Visceral Fat Area; FFMI: Fat-Free Mass Index; FMI: Fat Mass Index; SMI: Skeletal Muscle Index; SBP: Systolic Blood Pressure; DBP: Diastolic Blood Pressure; HDL-C: low-density lipoprotein-cholesterol; LDL-C: high-density lipoproteincholesterol.

a Significant difference compared to nonsarcopenic nonobesity.

b Significant difference compared to nonsarcopenic obesity.

c Significant difference compared to sarcopenic nonobesity.

d Significant difference compared to sarcopenic obesity (LSD post hoc tests).
