# Supplementary material for: Association between blood cell inflammatory indices and sarcopenic obesity in middle-aged and older Chinese adults: a cross-sectional study
Source: Research Square preprint supplement (doi:10.21203/rs.3.rs-8441209/v1), 2026-01-28
Supplement: Supplementary file 5 [file 8bcfc4304cc596c607ec843d.docx]

Additional file 9. Association between sarcopenic obesity defined by PBF and blood cell inflammatory indices

|  | unadjusted model  OR ( 95% CI) | p | Model 1  OR ( 95% CI) | P | Model 2  OR ( 95% CI) | P | Model 3  OR ( 95% CI) | P |
| --- | --- | --- | --- | --- | --- | --- | --- | --- |
| NLR | 1.311(0.945 – 1.819) | 0.105 | 1.142(0.812 – 1.606) | 0.447 | 1.115(0.786 – 1.582) | 0.542 | 1.046(0.730 – 1.501) | 0.805 |
| PLR | 0.573(0.397 – 0.826) | 0.003 | 0.732(0.518 – 1.035) | 0.078 | 0.790(0.558 – 1.118) | 0.184 | 0.830(0.582 – 1.181) | 0.300 |
| LMR | 0.683(0.484 – 0.963) | 0.029 | 0.892(0.624 – 1.274) | 0.529 | 0.856(0.595 – 1.230) | 0.400 | 0.875(0.603 – 1.270) | 0.482 |
| PWR | 0.375(0.243 – 0.577) | 0.000 | 0.604(0.392 – 0.930) | 0.022 | 0.664(0.430 – 1.026) | 0.065 | 0.747(0.487 – 1.148) | 0.184 |
| SII | 1.069(0.835 – 1.370) | 0.595 | 1.130(0.874 – 1.462) | 0.352 | 1.111(0.857 – 1.439) | 0.428 | 1.064(0.820 – 1.381) | 0.642 |
| AISI | 1.340(1.103 – 1.628) | 0.003 | 1.282(1.049 – 1.568) | 0.015 | 1.252(1.021 – 1.536) | 0.031 | 1.183(0.963 – 1.453) | 0.109 |
| SIRI | 1.635(1.296 – 2.064) | 0.000 | 1.396(1.093 – 1.783) | 0.007 | 1.358(1.056 – 1.748) | 0.017 | 1.262(0.974 – 1.637) | 0.079 |

NLR: Neutrophil-to-Lymphocyte Ratio; PLR: Platelet-to-Lymphocyte Ratio; LMR: Lymphocyte-to-Monocyte Ratio; PWR: Platelet-to-White Blood Cell Ratio; SII: Systemic Immune-Inflammation Index; SIRI: Systemic Inflammatory Response Index; AISI: Aggregate Inflammation Systemic Index.

Model 1 = age, gender; Model 2 = Model 1 + hypertension, diabetes; Model 3 = Model 2 + high-density lipoprotein cholesterol, low-density lipoprotein cholesterol, triglycerides, total cholesterol, creatinine.
