# Supplementary material for: Association between blood cell inflammatory indices and sarcopenic obesity in middle-aged and older Chinese adults: a cross-sectional study
Source: Research Square preprint supplement (doi:10.21203/rs.3.rs-8441209/v1), 2026-01-28
Supplement: Supplementary file 6 [file a03d22c4d0459d5abd88a7a3.docx]

Additional file 5. The blood cell counts and blood cell inflammatory indices of patients classified using BMI [X±s, M(Q1, Q3)]

|  | nonsarcopenic nonobesity n = 411, 40.7% | nonsarcopenic obesity  n= 33, 3.3% | Sarcopenic nonobesity  n = 383, 37.9% | sarcopenic obesity n = 182, 18.0% | P value |
| --- | --- | --- | --- | --- | --- |
| WBC/( 10^9 /L) | 5.79±1.48 c, d | 6.14±1.85 | 6.11±1.38 a, d | 6.56±1.82 a, c | <0.001 |
| NEUT /( 10^9 /L) | 3.47±2.60 d | 3.59±1.43 | 3.64±2.30 | 3.94±1.55 a | 0.151 |
| LYM/( 10^9 /L) | 1.96±0.57 c, d | 2.01±0.50 | 2.07±0.59 a | 2.08±0.58 a | 0.047 |
| MONO/( 10^9 /L) | 0.37±1.41 | 0.31±0.13 | 0.32±0.11 | 0.35±0.10 | 0.885 |
| PLT /( 10^9 /L) | 218.10±51.60 b | 271.03±31.58 a, c, d | 224.16±58.53 b | 220.57±57.23 b | 0.002 |
| PLR | 112.57(90.60, 138.82) | 111.79(93.41, 123.91) | 108.64(88.77, 134.22) | 107.25(84.89, 132.54) | 0.287 |
| NLR | 1.67(1.34, 2.16) | 1.64(1.41, 2.24) | 1.69(1.31, 2.09) | 1.79(1.39, 2.28) | 0.097 |
| LMR | 6.48(5.28, 7.96) d | 6.85(5.45, 7.98) | 6.66(5.06, 8.35) d | 5.92(4.85, 7.60) | 0.032 |
| PWR | 38.03(31.23, 45.91) d | 36.66(31.12, 42.2) | 36.54(30.08, 44.13) | 34.30(28.50, 41.18) | 0.001 |
| SII | 361.20(268.85, 474.59) | 338.94(311.97, 458.38) | 373.55(273.45, 490.66) | 392.88(300.31, 516.58) | 0.133 |
| SIRI | 0.49(0.33, 0.69) | 0.47(0.37, 0.60) | 0.52(0.36, 0.72) | 0.59(0.42, 0.88) a, c | <0.001 |
| AISI | 106.33(68.26, 153.41) | 97.13(75.78, 135.50) | 111.11(76.42, 167.02) | 130.20(86.39, 187.14) a, c | <0.001 |

WBC: white blood cells; NEUT: neutrophils; LYM: lymphocytes; MONO: monocytes; PLT: platelets; NLR: neutrophil-to-lymphocyte ratio; PLR: platelet-to-lymphocyte ratio; LMR: lymphocyte-to-monocyte ratio; PWR: platelet-to-white blood cell ratio; SII: systemic immune-inflammation index; SIRI: systemic inflammation response index; AISI: aggregate inflammation systemic index.

a Significant difference compared to nonsarcopenic nonobesity.

b Significant difference compared to nonsarcopenic obesity.

c Significant difference compared to sarcopenic nonobesity.

d Significant difference compared to sarcopenic obesity (LSD post hoc tests).
