# Supplementary material for: Association between blood cell inflammatory indices and sarcopenic obesity in middle-aged and older Chinese adults: a cross-sectional study
Source: Research Square preprint supplement (doi:10.21203/rs.3.rs-8441209/v1), 2026-01-28
Supplement: Supplementary file 7 [file a99bded3c35b09cbe4657436.docx]

Additional file 3. The main baseline characteristics of patients classified using VFA.

|  | nonsarcopenic nonobesity n = 331, 32.8% | nonsarcopenic obesity  n=113, 11.1 % | Sarcopenic nonobesity n = 72, 7.1% | sarcopenic obesity n = 493, 48.8 % | P value |
| --- | --- | --- | --- | --- | --- |
| **Demographics** |  |  |  |  |  |
| Age (years) | 58.79±7.25 c, d | 57.47±5.61 c, d | 63.86±7.91 a, b, d | 61.43±8.14 a, b, c | <0.001 |
| Gender / % male | 197(59.5%) | 47(41.5%) | 61(84.7%) | 209(42.3%) | <0.001 |
| Hypertension (%) | 74(22.4%) | 43(38.0%) | 24(33.3%) | 227(46.0%) | <0.001 |
| Diabetes (%) | 29(8.7%) | 18(15.9%) | 8(11.1%) | 79(16.0%) | 0.018 |
| Osteoporosis(%) | 230(69.4%) | 80(70%) | 46(63.8%) | 347(70.3%) | 0.722 |
| Nonalcoholic fatty liver (%) | 66(19.9%) | 59(52.2%) | 22(30.5%) | 280(56.7%) | <0.001 |
| **Metabolic panel** |  |  |  |  |  |
| Triglycerides (mmol/l) | 1.59±2.18 b, d | 2.05±1.87 a | 1.69±1.08 | 1.90±1.44 a | <0.001 |
| Total cholesterol (mmol/l) | 5.16±1.22 | 5.29±0.97 c | 4.88±0.98 b, d | 5.21±1.11 c | 0.089 |
| HDL-C (mmol/l) | 1.46±0.38 b, c, d | 1.30±0.30 a | 1.31±0.34 a | 1.33±0.38 a | <0.001 |
| LDL-C (mmol/l) | 3.14±1.03 | 3.23±0.88 c | 2.94±0.77 b, d | 3.21±0.98 c | 0.145 |
| Creatinine (μmol /L) | 65.26±15.28 c, d | 63.20±12.67 c | 70.77±13.60 a, b, d | 61.07±16.03 a, c | 0.000 |
| Uric acid (μmol/L) | 338.60±84.14 b, c, d | 359.65±81.36 a | 363.13±97.11 a | 355.84±94.03 a | 0.018 |
| Fasting blood glucose (mmol/L) | 5.62±1.52 d | 5.97±1.62 | 5.87±1.59 | 6.04±1.94 a | 0.010 |
| **Anthropometric Measurements** |  |  |  |  |  |
| Height (cm) | 164.71±7.89 b, c, d | 166.68±8.33 a, c, d | 162.54±7.54 a, b | 160.65±8.73 a, b, c | <0.001 |
| Weight (kg) | 63.43±10.26 b, d | 74.20±11.10 a, c, d | 64.43±8.19 b, d | 70.95±12.33 a, b, c | <0.001 |
| WC (cm) | 81.94±8.69 b, c, d | 89.81±9.01 a, c | 85.77±6.71 a, b, d | 90.70±9.94 a, c | <0.001 |
| BMI (kg/m²) | 23.24±2.47 b, c, d | 26.57±2.23 a, c, d | 24.31±2.08 a, b, d | 27.34±3.04 a, b, c | <0.001 |
| SBP (mmHg) | 126.48±15.03 b, d | 134.88±19.11 a | 130.97±16.95 d | 137.04±19.16 a, c | <0.001 |
| DBP (mmHg) | 76.82±9.94 b, d | 80.89±12.33 a | 79.51±10.55 | 80.57±11.37 a | <0.001 |
| PBF (%) | 26.76±4.99 b, c, d | 32.41±3.91 a, c, d | 30.37±3.96 a, b, d | 38.33±4.56 a, b, c | <0.001 |
| WHR | 0.88±0.05 b, c, d | 0.94±0.04 a, c, d | 0.90±0.03 a, b, d | 0.96±0.06 a, b, c | <0.001 |
| VFA (cm2) | 76.88±15.97 b, c, d | 115.16±11.34 a, c, d | 90.09±9.45 a, b, d | 142.81±28.44 a, b, c | <0.001 |
| FFMI (kg/m²) | 17.66±12.23 | 17.99±2.18 | 16.63±2.22 | 16.82±1.96 | 0.211 |
| FMI (kg/m²) | 6.24±1.26 b, c, d | 8.57±0.99 a, c, d | 7.35±1.13 a, b, d | 10.52±2.00 a, b, c | <0.001 |
| SMI (kg/m²) | 7.09±1.29 b | 7.52±1.00 a, c, d | 6.95±0.90 b | 6.94±1.03 b | <0.001 |
| SMI/WT | 40.07±3.58 b, c, d | 37.14±2.83 a, d | 37.59±1.83 a, d | 33.32±2.96 a, b, c | <0.001 |

BMI: Body Mass Index; PBF: Percent Body Fat; WHR: Waist-Hip Ratio; VFA: Visceral Fat Area; FFMI: Fat-Free Mass Index; FMI: Fat Mass Index; SMI: Skeletal Muscle Index; SBP: Systolic Blood Pressure; DBP: Diastolic Blood Pressure; HDL-C: low-density lipoprotein-cholesterol; LDL-C: high-density lipoproteincholesterol.

a Significant difference compared to nonsarcopenic nonobesity.

b Significant difference compared to nonsarcopenic obesity.

c Significant difference compared to sarcopenic nonobesity.

d Significant difference compared to sarcopenic obesity (LSD post hoc tests).
