# Supplementary material for: Association between blood cell inflammatory indices and sarcopenic obesity in middle-aged and older Chinese adults: a cross-sectional study
Source: Research Square preprint supplement (doi:10.21203/rs.3.rs-8441209/v1), 2026-01-28
Supplement: Supplementary file 8 [file c48ea4c4af4ec1e1b976e4af.docx]

Additional file 7. Association between sarcopenic obesity defined by VFA and blood cell inflammatory indices

|  | unadjusted model  OR ( 95% CI) | p | Model 1  OR ( 95% CI) | P | Model 2  OR ( 95% CI) | P | Model 3  OR ( 95% CI) | P |
| --- | --- | --- | --- | --- | --- | --- | --- | --- |
| NLR | 1.070(0.778 – 1.427) | 0.676 | 1.063(0.937 – 1.205) | 0.343 | 1.117(0.794 – 1.571) | 0.526 | 1.067(0.753 – 1.512) | 0.714 |
| PLR | 0.739(0.530 – 1.031) | 0.075 | 0.997(0.994 – 1.001) | 0.111 | 0.742(0.510 – 1.078) | 0.118 | 0.771(0.528 – 1.126) | 0.178 |
| LMR | 1.103(0.794 – 1.532) | 0.560 | 0.994(0.941 – 1.050) | 0.829 | 0.912(0.639 – 1.301) | 0.611 | 0.920(0.642 – 1.320) | 0.652 |
| PWR | 0.657(0.448 – 0.964) | 0.032 | 0.982(0.969 – 0.994) | 0.003 | 0.556(0.349 – 0.887) | 0.014 | 0.609(0.380 – 0.976) | 0.039 |
| SII | 1.119(0.879 – 1.424) | 0.362 | 1.000(1.000 – 1.001) | 0.306 | 1.151(0.895 – 1.480) | 0.273 | 1.113(0.860 – 1.439) | 0.416 |
| AISI | 1.197(0.995 – 1.441) | 0.057 | 1.000(1.000 – 1.000) | 0.819 | 1.282(1.054 – 1.560) | 0.013 | 1.230(1.009 – 1.500) | 0.040 |
| SIRI | 1.220(0.978 – 1.521) | 0.078 | 0.999(0.914 – 1.092) | 0.976 | 1.370(1.072 – 1.751) | 0.012 | 1.299(1.010 – 1.669) | 0.041 |

NLR: Neutrophil-to-Lymphocyte Ratio; PLR: Platelet-to-Lymphocyte Ratio; LMR: Lymphocyte-to-Monocyte Ratio; PWR: Platelet-to-White Blood Cell Ratio; SII: Systemic Immune-Inflammation Index; SIRI: Systemic Inflammatory Response Index; AISI: Aggregate Inflammation Systemic Index.

Model 1 = age, gender; Model 2 = Model 1 + hypertension, diabetes; Model 3 = Model 2 + high-density lipoprotein cholesterol, low-density lipoprotein cholesterol, triglycerides, total cholesterol, creatinine.
