# Supplementary material for: Association between blood cell inflammatory indices and sarcopenic obesity in middle-aged and older Chinese adults: a cross-sectional study
Source: Research Square preprint supplement (doi:10.21203/rs.3.rs-8441209/v1), 2026-01-28
Supplement: Supplementary file 9 [file f4e581fee9ff6472bcda491e.docx]

Additional file 6. The blood cell counts and blood cell inflammatory indices of patients classified using PBF [X±s, M(Q1, Q3)]

|  | nonsarcopenic nonobesity n = 439, 43.5% | nonsarcopenic obesity  n= 5, 0.5% | Sarcopenic nonobesity  n = 181, 17.9% | sarcopenic obesity n = 384, 38.1% | P value |
| --- | --- | --- | --- | --- | --- |
| WBC/( 10^9 /L) | 5.81±1.50 d | 7.02±1.65 | 5.99±1.51 d | 6.38±1.55 a, c | <0.001 |
| NEUT /( 10^9 /L) | 3.47±2.54 | 4.18±1.40 | 3.49±1.26 | 3.85±2.41 | 0.091 |
| LYM/( 10^9 /L) | 1.96±0.57 d | 2.24±0.30 | 2.01±0.57 | 2.10±0.59 a | 0.010 |
| MONO/( 10^9 /L) | 0.37±1.37 | 0.41±0.11 | 0.30±0.10 | 0.34±0.11 | 0.887 |
| PLT /( 10^9 /L) | 221.76±98.60 | 246.40±26.90 | 228.30±59.13 | 220.51±57.49 | 0.626 |
| PLR | 112.57(91.30, 138.57) d | 105.91(94.77, 131.30) | 110.71(92.93, 143.95) | 105.56(86.29, 130.21) | 0.026 |
| NLR | 1.66(1.35, 2.16) | 1.98(1.26, 2.42) | 1.74(1.30, 2.10) | 1.72(1.35, 2.19) | 0.584 |
| LMR | 6.53(5.31, 8.00) | 5.35(4.11, 7.55) | 6.93(5.21, 8.57) d | 6.18(4.90, 7.84) | 0.017 |
| PWR | 37.97(31.35, 45.89) d | 32.87(28.49, 47.16) | 37.34(31.58, 45.74) d | 34.74(28.90, 41.96) | <0.001 |
| SII | 359.77(274.01, 472.77) | 473.22(315.21, 600.80) | 386.52(266.37, 509.89) | 372.79(289.58, 488.40) | 0.257 |
| SIRI | 0.48(0.34, 0.68) | 0.67(0.42, 1.29) | 0.50(0.35, 0.70) | 0.56(0.40, 0.80) a, c | <0.001 |
| AISI | 105.20(69.36, 150.51) | 160.89(104.71, 322.11) | 107.17(74.04, 169.14) | 122.02(82.82, 178.87) a | <0.001 |

WBC: white blood cells; NEUT: neutrophils; LYM: lymphocytes; MONO: monocytes; PLT: platelets; NLR: neutrophil-to-lymphocyte ratio; PLR: platelet-to-lymphocyte ratio; LMR: lymphocyte-to-monocyte ratio; PWR: platelet-to-white blood cell ratio; SII: systemic immune-inflammation index; SIRI: systemic inflammation response index; AISI: aggregate inflammation systemic index.

a Significant difference compared to nonsarcopenic nonobesity.

b Significant difference compared to nonsarcopenic obesity.

c Significant difference compared to sarcopenic nonobesity.

d Significant difference compared to sarcopenic obesity (LSD post hoc tests).
